# Supplementary material for: Neuronal Differentiation of Human Mesenchymal Stem Cells Using Exosomes Derived from Differentiating Neuronal Cells
Source: PLoS One. 2015 Aug 6;10(8):e0135111. doi: 10.1371/journal.pone.0135111 (PMC4527703; doi:10.1371/journal.pone.0135111)
Supplement: S1 File — This file contains the sequences of the probe used for the microarray assay. The raw data of the microarray was also contained. (XLSX) [file pone.0135111.s001.xlsx]

## Sheet: Sheet1
Raw data was background-subtracted and log2 transformed and normalized
Intensity for each oligo probe is based on averaging of triplicate spots
3400	Mammalian and control probes were on the microarray
331	Total Mouse and Rat non-flagged, non-saturated probes on the microarray
0	Total non-saturated, non-flagged Mouse and Rat probes detected in at least one sample on the microarray
Normalized threshold is calculated based on: log2(5* stdev of negative controls) + trim mean (log2-transformed negative control probe signals)
Normalized TPT95+1 is calculated based on 95th percentile of negative control probe signal
"NA" in fold changes if both values below threshold
														Customer ID			D0	D3	D9	B16F10
														Species			Rat	Rat	Rat	Mouse
														Normalized TPT95+1			5.65398	7.28812	5.97642	6.12847
														Normalized Thresholds			4.74839	5.72764	4.49226	5.28021
	M19_rno_miRNA_name	M19_rno_MIMAT_ID	M19_rno_miRNA_sequence	M19_mmu_miRNA_name	M19_mmu_MIMAT_ID	M19_mmu_miRNA_sequence				Probe Sequence	Fold Change: D3 vs D0	Fold Change: D9 vs D0	Fold Change: D9 vs D3	Fold Change: B16F10 vs D0	Fold Change: B16F10 vs D3	Fold Change: B16F10 vs D9	676A_650_D0	676B_650_D3	676C_650_D9	676D_650_B16F10	Max Fold Change
	rno-miR-125b-1-3p	MIMAT0004730	ACGGGUUAGGCUCUUGGGAGCU	mmu-miR-125b-1-3p	MIMAT0004669	ACGGGUUAGGCUCUUGGGAGCU				AGCTCCCAAGAGCCTAACCCGTAGCTCCCAAGAGCCTAACCCGT	1.77137	3.41448	1.92759	0.0106905	0.00603514	0.00313092	10.6401	11.465	12.4118	4.09261	319.395
	rno-miR-222-3p	MIMAT0000891	AGCUACAUCUGGCUACUGGGU	mmu-miR-222-3p	MIMAT0000670	AGCUACAUCUGGCUACUGGGU				ACCCAGTAGCCAGATGTAGCTACCCAGTAGCCAGATGTAGCT	0.821945	1.16541	1.41787	0.00663398	0.00807108	0.00569239	8.47191	8.18902	8.69275	1.236	175.673
	rno-miR-31a-5p	MIMAT0000810	AGGCAAGAUGCUGGCAUAGCUG	mmu-miR-31-5p	MIMAT0000538	AGGCAAGAUGCUGGCAUAGCUG				AGCTATGCCAGCATCTTGCCTAGCTATGCCAGCATCTTGCCT	4.53517	3.24897	0.716396	161.382	35.5845	49.6716	1.10979	3.29094	2.80977	8.44412	161.382
	rno-miR-146a-5p	MIMAT0000852	UGAGAACUGAAUUCCAUGGGUU	mmu-miR-146a-5p	MIMAT0000158	UGAGAACUGAAUUCCAUGGGUU				AACCCATGGAATTCAGTTCTCAAACCCATGGAATTCAGTTCTCA	6.58097	2.43904	0.370621	76.0472	11.5556	31.1791	1.77645	4.49475	3.06277	8.02528	76.0472
	rno-miR-672-5p	MIMAT0005327	UGAGGUUGGUGUACUGUGUGUGA	mmu-miR-672-5p	MIMAT0003735	UGAGGUUGGUGUACUGUGUGUGA				CACACACAGTACACCAACCTCCACACACAGTACACCAACCTC	1.08763	0.461579	0.424389	0.0154699	0.0142235	0.0335152	8.85853	8.97972	7.74318	2.84414	70.3063
	rno-miR-335	MIMAT0000575	UCAAGAGCAAUAACGAAAAAUGU	mmu-miR-335-5p	MIMAT0000766	UCAAGAGCAAUAACGAAAAAUGU				ACATTTTTCGTTATTGCTCTTGAACATTTTTCGTTATTGCTCTTGA	0.854993	2.94007	3.4387	0.0449131	0.0525304	0.0152762	5.75121	5.52519	7.30706	1.27449	65.4612
	rno-miR-702-5p	MIMAT0017884	GUGAGUGGGGUGGUUGGCAUG	mmu-miR-702-5p	MIMAT0022931	GUGAGUGGGGUGGUUGGCAUG				CATGCCAACCACCCCACTCACCATGCCAACCACCCCACTCAC	1.12956	0.606716	0.537126	0.0195484	0.0173062	0.03222	11.4012	11.577	10.6803	5.72443	57.7827
	rno-miR-370-3p	MIMAT0003122	GCCUGCUGGGGUGGAACCUGGU	mmu-miR-370-3p	MIMAT0001095	GCCUGCUGGGGUGGAACCUGGU				ACCAGGTTCCACCCCAGCAACCAGGTTCCACCCCAGCA	0.881184	0.447091	0.507375	0.0184884	0.0209813	0.0413527	9.00069	8.8182	7.83933	3.24345	54.0879
	rno-miR-182	MIMAT0005300	UUUGGCAAUGGUAGAACUCACACCG	mmu-miR-182-5p	MIMAT0000211	UUUGGCAAUGGUAGAACUCACACCG				TGTGAGTTCTACCATTGCCAAATGTGAGTTCTACCATTGCCAAA	4.61484	7.58765	1.64418	0.142242	0.0308228	0.0187466	5.73104	7.93732	8.65469	2.91746	53.3431
	rno-miR-221-3p	MIMAT0000890	AGCUACAUUGUCUGCUGGGUUUC	mmu-miR-221-3p	MIMAT0000669	AGCUACAUUGUCUGCUGGGUUUC				GAAACCCAGCAGACAATGTAGCTGAAACCCAGCAGACAATGTAGCT	1.00869	1.40489	1.39279	0.0269761	0.0267438	0.0192016	10.0519	10.0644	10.5423	4.8397	52.079
	rno-miR-323-5p	MIMAT0004637	AGGUGGUCCGUGGCGCGUUCGC	mmu-miR-323-5p	MIMAT0004638	AGGUGGUCCGUGGCGCGUUCGC				AACGCGCCACGGACCACCTAACGCGCCACGGACCACCT	0.902337	0.396361	0.439261	0.0193216	0.0214129	0.0487475	8.91823	8.76997	7.58312	3.22459	51.7555
	rno-miR-296-3p	MIMAT0004742	GAGGGUUGGGUGGAGGCUCUCC	mmu-miR-296-3p	MIMAT0004576	GAGGGUUGGGUGGAGGCUCUCC				AGAGCCTCCACCCAACCCTAGAGCCTCCACCCAACCCT	1.83241	1.62643	0.887593	0.0362949	0.0198072	0.0223156	9.94306	10.8168	10.6448	5.15897	50.4867
	rno-miR-674-5p	MIMAT0005329	GCACUGAGAUGGGAGUGGUGUA	mmu-miR-674-5p	MIMAT0003740	GCACUGAGAUGGGAGUGGUGUA				TACACCACTCCCATCTCAGTGTACACCACTCCCATCTCAGTG	1.39617	0.472771	0.33862	0.034469	0.0246882	0.0729083	6.62288	7.10435	5.54209	1.76432	40.5051
	rno-miR-19b-3p	MIMAT0000788	UGUGCAAAUCCAUGCAAAACUGA	mmu-miR-19b-3p	MIMAT0000513	UGUGCAAAUCCAUGCAAAACUGA				TCAGTTTTGCATGGATTTGCACATCAGTTTTGCATGGATTTGCACA	1.19723	3.21127	2.68224	0.07948	0.0663864	0.0247504	6.08425	6.34395	7.76739	2.43098	40.4034
	rno-miR-298-5p	MIMAT0000900	GGCAGAGGAGGGCUGUUCUUCCC	mmu-miR-298-5p	MIMAT0000376	GGCAGAGGAGGGCUGUUCUUCCC				GGAAGAACAGCCCTCCTCTGGAAGAACAGCCCTCCTCT	0.373569	0.0873024	0.233698	0.0261521	0.0700059	0.299558	7.49293	6.07238	3.97509	2.236	38.2379
	rno-miR-30b-5p	MIMAT0000806	UGUAAACAUCCUACACUCAGCU	mmu-miR-30b-5p	MIMAT0000130	UGUAAACAUCCUACACUCAGCU				AGCTGAGTGTAGGATGTTTACAAGCTGAGTGTAGGATGTTTACA	3.65803	7.18712	1.96475	0.210726	0.0576065	0.02932	5.35412	7.22519	8.19954	3.10757	34.1064
	rno-miR-342-3p	MIMAT0000589	UCUCACACAGAAAUCGCACCCGU	mmu-miR-342-3p	MIMAT0000590	UCUCACACAGAAAUCGCACCCGU				ACGGGTGCGATTTCTGTGTGAGAACGGGTGCGATTTCTGTGTGAGA	1.10941	0.457235	0.412142	0.0373064	0.0336272	0.0815912	6.71256	6.86236	5.58357	1.96813	29.7379
	rno-let-7e-5p	MIMAT0000777	UGAGGUAGGAGGUUGUAUAGUU	mmu-let-7e-5p	MIMAT0000524	UGAGGUAGGAGGUUGUAUAGUU				AACTATACAACCTCCTACCTCAAACTATACAACCTCCTACCTCA	0.74842	0.552796	0.738617	0.0376823	0.0503491	0.0681667	6.81407	6.39599	5.95889	2.0841	26.5377
	rno-miR-183-5p	MIMAT0000860	UAUGGCACUGGUAGAAUUCACU	mmu-miR-183-5p	MIMAT0000212	UAUGGCACUGGUAGAAUUCACU				AGTGAATTCTACCAGTGCCATAAGTGAATTCTACCAGTGCCATA	1.00761	2.31791	2.30039	0.088312	0.0876446	0.0380998	7.35933	7.37027	8.57215	3.85808	26.2468
	rno-miR-188-5p	MIMAT0005301	CAUCCCUUGCAUGGUGGAGGG	mmu-miR-188-5p	MIMAT0000217	CAUCCCUUGCAUGGUGGAGGG				CCTCCACCATGCAAGGGATCCTCCACCATGCAAGGGAT	0.620426	0.554699	0.894061	0.041841	0.0674391	0.0754301	8.67554	7.98688	7.82532	4.09661	23.9
	rno-miR-122-5p	MIMAT0000827	UGGAGUGUGACAAUGGUGUUUG	mmu-miR-122-5p	MIMAT0000246	UGGAGUGUGACAAUGGUGUUUG				AAACACCATTGTCACACTCCAAAACACCATTGTCACACTCCA	0.270028	0.0449024	0.166288	0.466607	1.728	10.3916	7.65581	5.76699	3.17874	6.55609	22.2705
	rno-miR-129-2-3p	MIMAT0000601	AAGCCCUUACCCCAAAAAGCAU	mmu-miR-129-2-3p	MIMAT0000544	AAGCCCUUACCCCAAAAAGCAU				ATGCTTTTTGGGGTAAGGGCTTATGCTTTTTGGGGTAAGGGCTT	2.51744	0.804589	0.319605	17.7194	7.03865	22.0229	3.68229	5.01425	3.36862	7.82955	22.0229
	rno-miR-34c-5p	MIMAT0000814	AGGCAGUGUAGUUAGCUGAUUGC	mmu-miR-34c-5p	MIMAT0000381	AGGCAGUGUAGUUAGCUGAUUGC				AATCAGCTAACTACACTGCCTAATCAGCTAACTACACTGCCT	4.16105	21.0841	5.06701	2.77685	0.667343	0.131704	3.44526	5.50221	7.84334	4.91871	21.0841
	rno-miR-30c-2-3p	MIMAT0005442	CUGGGAGAAGGCUGUUUACUCU	mmu-miR-30c-2-3p	MIMAT0005438	CUGGGAGAAGGCUGUUUACUCU				AGAGTAAACAGCCTTCTCCCAAGAGTAAACAGCCTTCTCCCA	0.478159	0.18703	0.391145	3.56712	7.46011	19.0725	5.27762	4.21318	2.85896	7.11238	19.0725
	rno-miR-1188-5p	MIMAT0017854	UGGUGUGAGGUUGGGCCAGGA	mmu-miR-1188-5p	MIMAT0005843	UGGUGUGAGGUUGGGCCAGGA				TCCTGGCCCAACCTCACACCATCCTGGCCCAACCTCACACCA	0.928053	0.408129	0.439769	0.0568932	0.0613038	0.1394	8.55901	8.45129	7.26611	4.42341	17.5768
	rno-miR-760-3p	MIMAT0005337	CGGCUCUGGGUCUGUGGGGA	mmu-miR-760-3p	MIMAT0003898	CGGCUCUGGGUCUGUGGGGA				TCCCCACAGACCCAGAGTCCCCACAGACCCAGAG	1.73767	0.602937	0.34698	0.103326	0.0594622	0.171371	6.05868	6.85583	5.32875	2.78395	16.8174
	rno-miR-185-5p	MIMAT0000862	UGGAGAGAAAGGCAGUUCCUGA	mmu-miR-185-5p	MIMAT0000214	UGGAGAGAAAGGCAGUUCCUGA				TCAGGAACTGCCTTTCTCTCCTCAGGAACTGCCTTTCTCTCC	0.16067	0.0805371	0.501256	0.0642126	0.399654	0.797305	8.93473	6.29691	5.30053	4.97373	15.5733
	rno-miR-125b-5p	MIMAT0000830	UCCCUGAGACCCUAACUUGUGA	mmu-miR-125b-5p	MIMAT0000136	UCCCUGAGACCCUAACUUGUGA				TCACAAGTTAGGGTCTCAGGGTCACAAGTTAGGGTCTCAGGG	0.600273	1.24426	2.07283	0.0804446	0.134014	0.0646526	10.1542	9.41785	10.4694	6.5183	15.4673
	rno-miR-206-3p	MIMAT0000879	UGGAAUGUAAGGAAGUGUGUGG	mmu-miR-206-3p	MIMAT0000239	UGGAAUGUAAGGAAGUGUGUGG				CACACACTTCCTTACATTCCACACACACTTCCTTACATTCCA	1.37017	0.368745	0.269124	0.0889651	0.0649301	0.241265	5.78325	6.23761	4.34395	2.29264	15.4012
	rno-miR-345-5p	MIMAT0000594	UGCUGACCCCUAGUCCAGUGC	mmu-miR-345-5p	MIMAT0000595	GCUGACCCCUAGUCCAGUGCUU				ACTGGACTAGGGGTCAGCAACTGGACTAGGGGTCAGCA	1.79867	1.06276	0.590859	14.9248	8.2977	14.0434	3.00462	3.85155	3.09244	6.90426	14.9248
	rno-miR-145-5p	MIMAT0000851	GUCCAGUUUUCCCAGGAAUCCCU	mmu-miR-145a-5p	MIMAT0000157	GUCCAGUUUUCCCAGGAAUCCCU				AGGGATTCCTGGGAAAACTGGACAGGGATTCCTGGGAAAACTGGAC	1.09629	0.559571	0.510421	7.03114	6.41356	12.5652	5.64774	5.78037	4.81013	8.4615	12.5652
	rno-miR-21-5p	MIMAT0000790	UAGCUUAUCAGACUGAUGUUGA	mmu-miR-21a-5p	MIMAT0000530	UAGCUUAUCAGACUGAUGUUGA				TCAACATCAGTCTGATAAGCTATCAACATCAGTCTGATAAGCTA	0.624084	1.12592	1.80411	0.0928004	0.148699	0.0824222	7.83267	7.15248	8.00377	4.40294	12.1327
	rno-miR-138-5p	MIMAT0000844	AGCUGGUGUUGUGAAUCAGGCCG	mmu-miR-138-5p	MIMAT0000150	AGCUGGUGUUGUGAAUCAGGCCG				GCCTGATTCACAACACCAGCTGCCTGATTCACAACACCAGCT	1.60344	0.488639	0.304745	5.31114	3.31235	10.8692	5.49329	6.17446	4.46014	7.90231	10.8692
	rno-miR-210-3p	MIMAT0000881	CUGUGCGUGUGACAGCGGCUGA	mmu-miR-210-3p	MIMAT0000658	CUGUGCGUGUGACAGCGGCUGA				TCAGCCGCTGTCACACGCACATCAGCCGCTGTCACACGCACA	1.09821	0.963379	0.877229	9.94787	9.05829	10.326	6.08435	6.2195	6.03053	9.39874	10.326
	rno-miR-99a-5p	MIMAT0000820	AACCCGUAGAUCCGAUCUUGUG	mmu-miR-99a-5p	MIMAT0000131	AACCCGUAGAUCCGAUCUUGUG				CACAAGATCGGATCTACGGGTCACAAGATCGGATCTACGGGT	1.26987	0.57552	0.453211	5.53774	4.36086	9.62214	4.1277	4.47238	3.33064	6.59699	9.62214
	rno-miR-10a-5p	MIMAT0000782	UACCCUGUAGAUCCGAAUUUGUG	mmu-miR-10a-5p	MIMAT0000648	UACCCUGUAGAUCCGAAUUUGUG				ACAAATTCGGATCTACAGGGTAACAAATTCGGATCTACAGGGTA	0.416809	0.547543	1.31365	0.105444	0.252979	0.192577	6.78774	5.52519	5.91878	3.54228	9.48371
	rno-miR-497-5p	MIMAT0003383	CAGCAGCACACUGUGGUUUGUA	mmu-miR-497-5p	MIMAT0003453	CAGCAGCACACUGUGGUUUGUA				TACAAACCACAGTGTGCTGCTTACAAACCACAGTGTGCTGCT	0.986686	4.80603	4.87088	0.516027	0.52299	0.107371	4.44359	4.42425	6.70844	3.48911	9.31353
	rno-miR-34b-5p	MIMAT0000813	AGGCAGUGUAAUUAGCUGAUUGU	mmu-miR-34b-5p	MIMAT0000382	AGGCAGUGUAAUUAGCUGAUUGU				CAATCAGCTAATTACACTGCCTCAATCAGCTAATTACACTGCCT	3.26848	8.25433	2.52544	1.15305	0.352779	0.13969	2.93529	4.64391	5.98044	3.14074	8.25433
	rno-miR-30c-1-3p	MIMAT0004719	CUGGGAGAGGGUUGUUUACUCC	mmu-miR-30c-1-3p	MIMAT0004616	CUGGGAGAGGGUUGUUUACUCC				GGAGTAAACAACCCTCTCCCAGGAGTAAACAACCCTCTCCCA	1.26077	0.990292	0.785467	0.15486	0.12283	0.156378	7.83395	8.16825	7.81987	5.14298	8.14134
	rno-miR-320-3p	MIMAT0000903	AAAAGCUGGGUUGAGAGGGCGA	mmu-miR-320-3p	MIMAT0000666	AAAAGCUGGGUUGAGAGGGCGA				TCGCCCTCTCAACCCAGCTTTTTCGCCCTCTCAACCCAGCTTTT	0.540785	0.351486	0.649955	0.12318	0.227779	0.350454	9.41682	8.52995	7.90836	6.39566	8.11822
	rno-miR-130a-3p	MIMAT0000836	CAGUGCAAUGUUAAAAGGGCAU	mmu-miR-130a-3p	MIMAT0000141	CAGUGCAAUGUUAAAAGGGCAU				ATGCCCTTTTAACATTGCACTGATGCCCTTTTAACATTGCACTG	1.82326	4.74857	2.60443	7.95807	4.36474	1.67589	8.03369	8.90022	10.2812	11.0261	7.95807
	rno-miR-195-5p	MIMAT0000870	UAGCAGCACAGAAAUAUUGGC	mmu-miR-195a-5p	MIMAT0000225	UAGCAGCACAGAAAUAUUGGC				GCCAATATTTCTGTGCTGCTAGCCAATATTTCTGTGCTGCTA	1.46089	7.91226	5.41604	1.65189	1.13074	0.208776	4.31551	4.86236	7.2996	5.03963	7.91226
	rno-miR-451-5p	MIMAT0001633	AAACCGUUACCAUUACUGAGUU	mmu-miR-451a	MIMAT0001632	AAACCGUUACCAUUACUGAGUU				AACTCAGTAATGGTAACGGTTTAACTCAGTAATGGTAACGGTTT	0.717368	0.127213	0.177333	0.369446	0.515002	2.90415	6.58201	6.10279	3.60733	5.14544	7.86082
	rno-miR-106b-3p	MIMAT0004727	CCGCACUGUGGGUACUUGCUGC	mmu-miR-106b-3p	MIMAT0004582	CCGCACUGUGGGUACUUGCUGC				GCAGCAAGTACCCACAGTGGCAGCAAGTACCCACAGTG	3.47836	1.21612	0.349626	7.40605	2.12918	6.08988	3.24813	5.04654	3.53042	6.13684	7.40605
	rno-miR-301a-3p	MIMAT0000552	CAGUGCAAUAGUAUUGUCAAAGC	mmu-miR-301a-3p	MIMAT0000379	CAGUGCAAUAGUAUUGUCAAAGC				GCTTTGACAATACTATTGCACTGGCTTTGACAATACTATTGCACTG	3.14403	6.86763	2.18434	5.92206	1.88359	0.862315	3.61062	5.26323	6.39043	6.17672	6.86763
	rno-miR-1224	MIMAT0012827	GUGAGGACUGGGGAGGUGGAG	mmu-miR-1224-5p	MIMAT0005460	GUGAGGACUGGGGAGGUGGAG				CTCCACCTCCCCAGTCCTCACCTCCACCTCCCCAGTCCTCAC	2.88362	0.428208	0.148497	2.56569	0.889747	5.99169	11.6664	13.1943	10.4428	13.0258	6.73416
	rno-miR-15b-5p	MIMAT0000784	UAGCAGCACAUCAUGGUUUACA	mmu-miR-15b-5p	MIMAT0000124	UAGCAGCACAUCAUGGUUUACA				TGTAAACCATGATGTGCTGCTATGTAAACCATGATGTGCTGCTA	0.93138	2.32802	2.49954	5.8617	6.29356	2.51789	6.48825	6.38569	7.70735	9.03957	6.29356
	rno-miR-341	MIMAT0000587	UCGGUCGAUCGGUCGGUCGGU	mmu-miR-341-3p	MIMAT0000588	UCGGUCGAUCGGUCGGUCGGU				ACCGACCGACCGATCGACCGAACCGACCGACCGATCGACCGA	2.15073	2.10923	0.980703	0.345274	0.160538	0.163697	8.35782	9.46265	9.43454	6.82363	6.22907
	rno-miR-184	MIMAT0000861	UGGACGGAGAACUGAUAAGGGU	mmu-miR-184-3p	MIMAT0000213	UGGACGGAGAACUGAUAAGGGU				ACCCTTATCAGTTCTCCGTCCACCCTTATCAGTTCTCCGTCC	0.866244	0.286675	0.33094	1.58311	1.82755	5.52231	5.6439	5.43674	3.84139	6.30666	5.52231
	rno-miR-181b-5p	MIMAT0000859	AACAUUCAUUGCUGUCGGUGGGU	mmu-miR-181b-5p	MIMAT0000673	AACAUUCAUUGCUGUCGGUGGGU				ACCCACCGACAGCAATGAATGTTACCCACCGACAGCAATGAATGTT	0.780252	0.566686	0.726287	0.192616	0.246864	0.339899	9.20199	8.844	8.38261	6.82579	5.19167
	rno-miR-29b-3p	MIMAT0000801	UAGCACCAUUUGAAAUCAGUGUU	mmu-miR-29b-3p	MIMAT0000127	UAGCACCAUUUGAAAUCAGUGUU				AACACTGATTTCAAATGGTGCTAAACACTGATTTCAAATGGTGCTA	1.53318	2.4312	1.58573	0.469834	0.306445	0.193252	5.05654	5.67306	6.33821	3.96676	5.1746
	rno-miR-378a-3p	MIMAT0003379	ACUGGACUUGGAGUCAGAAGG	mmu-miR-378a-3p	MIMAT0003151	ACUGGACUUGGAGUCAGAAGG				CCTTCTGACTCCAAGTCCAGTCCTTCTGACTCCAAGTCCAGT	0.719209	0.697215	0.969418	3.57923	4.97662	5.13361	5.73842	5.2629	5.21809	7.57807	5.13361
	rno-miR-26a-5p	MIMAT0000796	UUCAAGUAAUCCAGGAUAGGCU	mmu-miR-26a-5p	MIMAT0000533	UUCAAGUAAUCCAGGAUAGGCU				AGCCTATCCTGGATTACTTGAAAGCCTATCCTGGATTACTTGAA	1.51274	4.84582	3.20333	1.61133	1.06517	0.332519	6.00249	6.59966	8.27923	6.69074	4.84582
	rno-miR-130b-3p	MIMAT0000837	CAGUGCAAUGAUGAAAGGGCAU	mmu-miR-130b-3p	MIMAT0000387	CAGUGCAAUGAUGAAAGGGCAU				ATGCCCTTTCATCATTGCACTATGCCCTTTCATCATTGCACT	1.344	2.44089	1.81613	4.81347	3.58144	1.97201	6.04474	6.47127	7.33214	8.31181	4.81347
	rno-miR-27b-3p	MIMAT0000798	UUCACAGUGGCUAAGUUCUGC	mmu-miR-27b-3p	MIMAT0000126	UUCACAGUGGCUAAGUUCUGC				CAGAACTTAGCCACTGTGAACAGAACTTAGCCACTGTGAA	1.29511	1.45477	1.12328	0.306708	0.23682	0.21083	5.80396	6.17704	6.34475	4.0989	4.74317
	rno-miR-24-3p	MIMAT0000794	UGGCUCAGUUCAGCAGGAACAG	mmu-miR-24-3p	MIMAT0000219	UGGCUCAGUUCAGCAGGAACAG				TGTTCCTGCTGAACTGAGCCATGTTCCTGCTGAACTGAGCCA	0.86283	1.59316	1.84643	0.346272	0.401321	0.21735	10.6599	10.447	11.3318	9.12988	4.60088
	rno-miR-150-5p	MIMAT0000853	UCUCCCAACCCUUGUACCAGUG	mmu-miR-150-5p	MIMAT0000160	UCUCCCAACCCUUGUACCAGUG				ACTGGTACAAGGGTTGGGAGAACTGGTACAAGGGTTGGGAGA	0.843418	0.220042	0.260893	0.356595	0.422798	1.62058	5.80628	5.5606	3.62213	4.31864	4.5446
	rno-miR-23a-5p	MIMAT0004712	GGGGUUCCUGGGGAUGGGAUUU	mmu-miR-23a-5p	MIMAT0017019	GGGGUUCCUGGGGAUGGGAUUU				AAATCCCATCCCCAGGAACCCCAAATCCCATCCCCAGGAACCCC	2.12862	0.742161	0.348658	0.469938	0.220771	0.633202	6.82838	7.9183	6.39819	5.73892	4.52959
	rno-miR-30d-5p	MIMAT0000807	UGUAAACAUCCCCGACUGGAAG	mmu-miR-30d-5p	MIMAT0000515	UGUAAACAUCCCCGACUGGAAG				CTTCCAGTCGGGGATGTTTACCTTCCAGTCGGGGATGTTTAC	0.362869	0.464312	1.27956	1.63303	4.50033	3.5171	9.23601	7.77353	8.12918	9.94357	4.50033
	rno-miR-106b-5p	MIMAT0000825	UAAAGUGCUGACAGUGCAGAU	mmu-miR-106b-5p	MIMAT0000386	UAAAGUGCUGACAGUGCAGAU				ATCTGCACTGTCAGCACTTTAATCTGCACTGTCAGCACTTTA	2.76166	4.37843	1.58543	1.39605	0.505512	0.318848	5.48134	6.94688	7.61176	5.9627	4.37843
	rno-miR-20a-5p	MIMAT0000602	UAAAGUGCUUAUAGUGCAGGUAG	mmu-miR-20a-5p	MIMAT0000529	UAAAGUGCUUAUAGUGCAGGUAG				CTACCTGCACTATAAGCACTTTACTACCTGCACTATAAGCACTTTA	1.43816	2.0791	1.44566	4.22941	2.94085	2.03425	6.08694	6.61117	7.1429	8.1674	4.22941
	rno-miR-29a-3p	MIMAT0000802	UAGCACCAUCUGAAAUCGGUUA	mmu-miR-29a-3p	MIMAT0000535	UAGCACCAUCUGAAAUCGGUUA				TAACCGATTTCAGATGGTGCTATAACCGATTTCAGATGGTGCTA	1.09302	4.18407	3.828	1.02947	0.941862	0.246045	9.50175	9.63006	11.5667	9.54365	4.18407
	rno-let-7i-5p	MIMAT0000779	UGAGGUAGUAGUUUGUGCUGUU	mmu-let-7i-5p	MIMAT0000122	UGAGGUAGUAGUUUGUGCUGUU				AACAGCACAAACTACTACCTCAAACAGCACAAACTACTACCTCA	1.87876	1.68746	0.898175	4.16576	2.21729	2.46866	6.83905	7.74883	7.5939	8.89763	4.16576
	rno-miR-92a-3p	MIMAT0000816	UAUUGCACUUGUCCCGGCCUG	mmu-miR-92a-3p	MIMAT0000539	UAUUGCACUUGUCCCGGCCUG				AGGCCGGGACAAGTGCAATAAGGCCGGGACAAGTGCAATA	0.639222	0.243838	0.381461	1.01405	1.58638	4.1587	8.6435	7.99789	6.6075	8.66363	4.1587
	rno-miR-17-5p	MIMAT0000786	CAAAGUGCUUACAGUGCAGGUAG	mmu-miR-17-5p	MIMAT0000649	CAAAGUGCUUACAGUGCAGGUAG				TACCTGCACTGTAAGCACTTTTACCTGCACTGTAAGCACTTT	1.36765	1.74609	1.27671	3.92382	2.86902	2.2472	5.3808	5.83251	6.18494	7.35306	3.92382
	rno-let-7a-5p	MIMAT0000774	UGAGGUAGUAGGUUGUAUAGUU	mmu-let-7a-5p	MIMAT0000521	UGAGGUAGUAGGUUGUAUAGUU				AACTATACAACCTACTACCTCAAACTATACAACCTACTACCTCA	1.06984	1.35383	1.26545	3.84833	3.59711	2.84256	9.19856	9.29595	9.6356	11.1428	3.84833
	rno-miR-877	MIMAT0005285	GUAGAGGAGAUGGCGCAGGG	mmu-miR-877-5p	MIMAT0004861	GUAGAGGAGAUGGCGCAGGG				CCTGCGCCATCTCCTCTACCTGCGCCATCTCCTCTA	0.650395	0.268564	0.412924	0.32213	0.495285	1.19946	7.1013	6.48068	5.20463	5.46701	3.72351
	rno-miR-99b-5p	MIMAT0000821	CACCCGUAGAACCGACCUUGCG	mmu-miR-99b-5p	MIMAT0000132	CACCCGUAGAACCGACCUUGCG				CAAGGTCGGTTCTACGGGTCAAGGTCGGTTCTACGGGT	0.395003	0.272685	0.690336	0.661917	1.67573	2.42741	7.30009	5.96003	5.4254	6.70482	3.66724
	rno-miR-30a-5p	MIMAT0000808	UGUAAACAUCCUCGACUGGAAG	mmu-miR-30a-5p	MIMAT0000128	UGUAAACAUCCUCGACUGGAAG				TTCCAGTCGAGGATGTTTACATTCCAGTCGAGGATGTTTACA	0.370608	0.665162	1.79479	1.34378	3.6259	2.02024	7.39004	5.958	6.80181	7.81634	3.6259
	rno-let-7d-5p	MIMAT0000562	AGAGGUAGUAGGUUGCAUAGUU	mmu-let-7d-5p	MIMAT0000383	AGAGGUAGUAGGUUGCAUAGUU				AACTATGCAACCTACTACCTCTAACTATGCAACCTACTACCTCT	0.83019	0.920221	1.10845	2.98069	3.59037	3.2391	6.70152	6.43303	6.58157	8.27716	3.59037
	rno-miR-125a-5p	MIMAT0000829	UCCCUGAGACCCUUUAACCUGUGA	mmu-miR-125a-5p	MIMAT0000135	UCCCUGAGACCCUUUAACCUGUGA				TCACAGGTTAAAGGGTCTCAGGGTCACAGGTTAAAGGGTCTCAGGG	0.979717	2.14634	2.19077	0.609034	0.621643	0.283755	6.58656	6.557	7.68844	5.87116	3.52417
	rno-miR-103-3p	MIMAT0000824	AGCAGCAUUGUACAGGGCUAUGA	mmu-miR-103-3p	MIMAT0000546	AGCAGCAUUGUACAGGGCUAUGA				TCATAGCCCTGTACAATGCTGCTTCATAGCCCTGTACAATGCTGCT	1.40272	2.28316	1.62766	3.47277	2.47573	1.52104	4.99895	5.48718	6.18998	6.79504	3.47277
	rno-let-7c-5p	MIMAT0000776	UGAGGUAGUAGGUUGUAUGGUU	mmu-let-7c-5p	MIMAT0000523	UGAGGUAGUAGGUUGUAUGGUU				AACCATACAACCTACTACCTCAAACCATACAACCTACTACCTCA	0.972881	1.09969	1.13035	3.37462	3.46869	3.0687	10.9467	10.9071	11.0838	12.7015	3.46869
	rno-miR-425-5p	MIMAT0005314	AAUGACACGAUCACUCCCGUUGA	mmu-miR-425-5p	MIMAT0004750	AAUGACACGAUCACUCCCGUUGA				TCAACGGGAGTGATCGTGTCATTTCAACGGGAGTGATCGTGTCATT	0.964825	0.293204	0.303893	0.979159	1.01486	3.33952	5.88846	5.8368	4.11844	5.85808	3.4106
	rno-let-7f-5p	MIMAT0000778	UGAGGUAGUAGAUUGUAUAGUU	mmu-let-7f-5p	MIMAT0000525	UGAGGUAGUAGAUUGUAUAGUU				AACTATACAATCTACTACCTCAAACTATACAATCTACTACCTCA	1.44491	1.42671	0.9874	3.25281	2.25121	2.27994	4.78259	5.31357	5.29528	6.48427	3.25281
	rno-miR-10a-3p	MIMAT0004709	CAAAUUCGUAUCUAGGGGAAUA	mmu-miR-10a-3p	MIMAT0004659	CAAAUUCGUAUCUAGGGGAAUA				TATTCCCCTAGATACGAATTTGTATTCCCCTAGATACGAATTTG	1.48831	0.927552	0.623225	2.87455	1.93142	3.09908	5.00118	5.57486	4.89268	6.52452	3.09908
	rno-miR-423-3p	MIMAT0005313	AGCUCGGUCUGAGGCCCCUCAGU	mmu-miR-423-3p	MIMAT0003454	AGCUCGGUCUGAGGCCCCUCAGU				ACTGAGGGGCCTCAGACCGAGCTACTGAGGGGCCTCAGACCGAGCT	0.879117	0.519944	0.591438	1.58025	1.79754	3.03927	6.48075	6.29487	5.53717	7.1409	3.03927
	rno-miR-107-3p	MIMAT0000826	AGCAGCAUUGUACAGGGCUAUCA	mmu-miR-107-3p	MIMAT0000647	AGCAGCAUUGUACAGGGCUAUCA				TGATAGCCCTGTACAATGCTGCTTGATAGCCCTGTACAATGCTGCT	1.51906	1.92396	1.26655	3.01323	1.98362	1.56616	5.59084	6.19402	6.53492	7.18215	3.01323
	rno-miR-505-5p	MIMAT0017226	GGGAGCCAGGAAGUAUUGAUGUU	mmu-miR-505-5p	MIMAT0017259	GGGAGCCAGGAAGUAUUGAUGUU				AACATCAATACTTCCTGGCTCCCAACATCAATACTTCCTGGCTCCC	1.17496	0.449901	0.382909	1.3438	1.14371	2.98689	7.53745	7.77006	6.38513	7.96377	2.98689
	rno-miR-129-5p	MIMAT0000600	CUUUUUGCGGUCUGGGCUUGC	mmu-miR-129-5p	MIMAT0000209	CUUUUUGCGGUCUGGGCUUGC				CAAGCCCAGACCGCAAAAACAAGCCCAGACCGCAAAAA	2.96783	1.40959	0.474956	1.69825	0.57222	1.20479	5.61293	7.18234	6.10821	6.37698	2.96783
	rno-let-7b-5p	MIMAT0000775	UGAGGUAGUAGGUUGUGUGGUU	mmu-let-7b-5p	MIMAT0000522	UGAGGUAGUAGGUUGUGUGGUU				AACCACACAACCTACTACCTCAAACCACACAACCTACTACCTCA	0.956433	0.919419	0.9613	2.65704	2.77807	2.88991	10.5454	10.4812	10.4242	11.9553	2.88991
	rno-miR-27a	MIMAT0000799	UUCACAGUGGCUAAGUUCCGC	mmu-miR-27a	MIMAT0000537	UUCACAGUGGCUAAGUUCCGC			Specificity Control	GCGGAACTTAGCCACTGTGAAGCGGAACTTAGCCACTGTGAA	0.653747	1.27914	1.95663	0.445975	0.682183	0.348653	7.69626	7.08306	8.05143	6.53129	2.86818
	rno-miR-30e-5p	MIMAT0000805	UGUAAACAUCCUUGACUGGAAG	mmu-miR-30e-5p	MIMAT0000248	UGUAAACAUCCUUGACUGGAAG				CTTCCAGTCAAGGATGTTTACACTTCCAGTCAAGGATGTTTACA	0.438424	1.24012	2.8286	0.505752	1.15357	0.407823	6.11917	4.92957	6.42966	5.13567	2.8286
	rno-miR-16-5p	MIMAT0000785	UAGCAGCACGUAAAUAUUGGCG	mmu-miR-16-5p	MIMAT0000527	UAGCAGCACGUAAAUAUUGGCG				GCCAATATTTACGTGCTGCTAGCCAATATTTACGTGCTGCTA	0.788664	2.1537	2.73082	1.30464	1.65424	0.605765	10.5082	10.1657	11.615	10.8918	2.73082
	rno-miR-449c-5p	MIMAT0017803	AGGCAGUGCAUUGCUAGCUGG	mmu-miR-449c-5p	MIMAT0003460	AGGCAGUGCAUUGCUAGCUGG				CAGCTAGCAATGCACTGCCTCAGCTAGCAATGCACTGCCT	2.66835	1.42409	0.533698	1.82055	0.682275	1.27839	8.12011	9.53606	8.63016	8.98449	2.66835
	rno-miR-93	MIMAT0000817	CAAAGUGCUGUUCGUGCAGGUAG	mmu-miR-93	MIMAT0000540	CAAAGUGCUGUUCGUGCAGGUAG			Specificity Control	CTACCTGCACGAACAGCACTTTGCTACCTGCACGAACAGCACTTTG	1.0286	1.06276	1.03321	2.61662	2.54386	2.4621	7.893	7.93369	7.98082	9.28071	2.61662
	rno-miR-328a-3p	MIMAT0000564	CUGGCCCUCUCUGCCCUUCCGU	mmu-miR-328-3p	MIMAT0000565	CUGGCCCUCUCUGCCCUUCCGU				ACGGAAGGGCAGAGAGGGCCAACGGAAGGGCAGAGAGGGCCA	1.34621	0.677723	0.503429	1.65202	1.22716	2.43761	6.09294	6.52185	5.53171	6.81717	2.43761
	rno-miR-144-5p	MIMAT0017130	GGAUAUCAUCAUAUACUGUAAGU	mmu-miR-144-5p	MIMAT0016988	GGAUAUCAUCAUAUACUGUAAGU				ACTTACAGTATATGATGATATCCACTTACAGTATATGATGATATCC	1.20994	0.595778	0.492402	1.44513	1.19438	2.42561	5.68734	5.96228	4.94019	6.21854	2.42561
	rno-miR-484	MIMAT0005319	UCAGGCUCAGUCCCCUCCCGAU	mmu-miR-484	MIMAT0003127	UCAGGCUCAGUCCCCUCCCGAU				ATCGGGAGGGGACTGAGCCTGAATCGGGAGGGGACTGAGCCTGA	2.30252	1.06778	0.463744	2.41547	1.04905	2.26214	5.06575	6.26896	5.16036	6.33805	2.41547
	rno-miR-361-5p	MIMAT0003117	UUAUCAGAAUCUCCAGGGGUAC	mmu-miR-361-5p	MIMAT0000704	UUAUCAGAAUCUCCAGGGGUAC				TACCCCTGGAGATTCTGATAATACCCCTGGAGATTCTGATAA	0.609337	0.417872	0.685783	0.757512	1.24317	1.81278	6.17841	5.46372	4.91954	5.77775	2.39308
	rno-miR-22-3p	MIMAT0000791	AAGCUGCCAGUUGAAGAACUGU	mmu-miR-22-3p	MIMAT0000531	AAGCUGCCAGUUGAAGAACUGU				ACAGTTCTTCAACTGGCAGCTTACAGTTCTTCAACTGGCAGCTT	0.622692	1.4281	2.29342	0.679501	1.09123	0.475809	8.59787	7.91446	9.11197	8.04042	2.29342
	rno-miR-23a-3p	MIMAT0000792	AUCACAUUGCCAGGGAUUUCC	mmu-miR-23a-3p	MIMAT0000532	AUCACAUUGCCAGGGAUUUCC				GAAATCCCTGGCAATGTGATGAAATCCCTGGCAATGTGAT	0.605925	0.521792	0.86115	0.437919	0.722729	0.83926	10.5425	9.81974	9.60407	9.35126	2.28353
	rno-miR-23b-3p	MIMAT0000793	AUCACAUUGCCAGGGAUUACC	mmu-miR-23b-3p	MIMAT0000125	AUCACAUUGCCAGGGAUUACC				GTAATCCCTGGCAATGTGATGTAATCCCTGGCAATGTGAT	0.721002	0.575675	0.798438	0.443102	0.614564	0.769708	9.37025	8.89832	8.57357	8.19596	2.25682
	rno-miR-1249	MIMAT0017892	ACGCCCUUCCCCCCCUUCUUCA	mmu-miR-1249-3p	MIMAT0010560	ACGCCCUUCCCCCCCUUCUUCA				TGAAGAAGGGGGGGAAGTGAAGAAGGGGGGGAAG	2.19822	1.28328	0.58378	1.7154	0.780358	1.33673	5.91889	7.05523	6.27872	6.69743	2.19822
	rno-miR-296-5p	MIMAT0000898	AGGGCCCCCCCUCAAUCCUGU	mmu-miR-296-5p	MIMAT0000374	AGGGCCCCCCCUCAAUCCUGU				ACAGGATTGAGGGGGGGCCCTACAGGATTGAGGGGGGGCCCT	1.44635	1.19948	0.829315	2.13814	1.4783	1.78256	5.33607	5.86849	5.59848	6.43243	2.13814
	rno-miR-191a-5p	MIMAT0000866	CAACGGAAUCCCAAAAGCAGCUG	mmu-miR-191-5p	MIMAT0000221	CAACGGAAUCCCAAAAGCAGCUG				CAGCTGCTTTTGGGATTCCGTTGCAGCTGCTTTTGGGATTCCGTTG	2.12886	1.34139	0.630096	1.44237	0.677534	1.07529	7.86743	8.95751	8.29115	8.39587	2.12886
	rno-miR-140-3p	MIMAT0000574	UACCACAGGGUAGAACCACGG	mmu-miR-140-3p	MIMAT0000152	UACCACAGGGUAGAACCACGG				GTGGTTCTACCCTGTGGTAGTGGTTCTACCCTGTGGTA	1.34184	1.21025	0.901934	2.03977	1.52013	1.68541	5.61905	6.04326	5.89436	6.64745	2.03977
	rno-miR-34a	MIMAT0000815	UGGCAGUGUCUUAGCUGGUUGU	mmu-miR-34a	MIMAT0000542	UGGCAGUGUCUUAGCUGGUUGU				ACAACCAGCTAAGACACTGCCACAACCAGCTAAGACACTGCC	1.08316	1.12589	1.03945	0.557853	0.515022	0.495476	7.40866	7.52391	7.57972	6.56661	2.01826
	rno-miR-30c-5p	MIMAT0000804	UGUAAACAUCCUACACUCUCAGC	mmu-miR-30c-5p	MIMAT0000514	UGUAAACAUCCUACACUCUCAGC				CTGAGAGTGTAGGATGTTTACACTGAGAGTGTAGGATGTTTACA	1.09187	1.92155	1.75986	1.0148	0.929409	0.528114	5.27061	5.39742	6.21288	5.2918	1.92155
	rno-miR-25-3p	MIMAT0000795	CAUUGCACUUGUCUCGGUCUGA	mmu-miR-25-3p	MIMAT0000652	CAUUGCACUUGUCUCGGUCUGA				TCAGACCGAGACAAGTGCAATTCAGACCGAGACAAGTGCAAT	0.534916	0.568053	1.06195	0.988474	1.8479	1.74011	9.33107	8.42846	8.51517	9.31435	1.86945
	rno-miR-181a-5p	MIMAT0000858	AACAUUCAACGCUGUCGGUGAGU	mmu-miR-181a-5p	MIMAT0000210	AACAUUCAACGCUGUCGGUGAGU				ACTCACCGACAGCGTTGAATGTTACTCACCGACAGCGTTGAATGTT	0.85746	1.22485	1.42846	1.28843	1.50262	1.05192	7.04719	6.82533	7.33979	7.41281	1.50262
